# Supplementary material
Source: MDPI journal article supplement (https://www.mdpi.com/2227-9717/11/7/1891)
Supplement: s1 [file s1]

# Investigation of the antimicrobial and physico-mechanical properties of nature-friendly nanosilver-loaded pig lining leather prepared using exhaustion method

Ngoc-Thang Nguyen <sup>1,\*</sup>, Tien-Hieu Vu <sup>1,2</sup>, Van-Huan Bui <sup>1</sup>, Duy-Nam Phan <sup>1</sup>, Thi-Hang Nguyen <sup>3</sup> and Thi-My-Linh Nguyen <sup>3</sup>

<sup>1</sup> Department of Textile Material and Chemical Processing, School of Textile-Leather and Fashion, Hanoi University of Science and Technology, 1 Dai Co Viet, Hanoi 11615, Vietnam; huan.buivan@hust.edu.vn (V.-H.B.); nam.phanduy@hust.edu.vn (D.-N.P.)

<sup>2</sup> Faculty of Fashion Design Technology, Ho Chi Minh City Industry and Trade College, 20 Tang Nhon Phu, Ho Chi Minh 71210, Vietnam; vutienhieu@hitu.edu.vn (T.-H.V.)

<sup>3</sup> Faculty of Garment Technology - Fashion, Industrial University of Ho Chi Minh City, 12 Nguyen Van Bao, Ho Chi Minh 71408, Vietnam; nguyenthidang@iuh.edu.vn (T.-H.N.); nguyenthimylinh\_tt@iuh.edu.vn (T.-M.-L.N.)

\* Correspondence: thang.nguyennoc@hust.edu.vn; Tel.: +84-904309930

The AgPBL was synthesized under optimized conditions following the methodology outlined in our previously published work [42]. The properties of AgPBL were characterized using UV-vis and TEM analyses.

The UV-vis spectrum depicted in Figure S1 exhibited a maximum absorption peak at 483 nm, attributed to the surface plasmon resonance (SPR) of spherical silver nanoparticles.

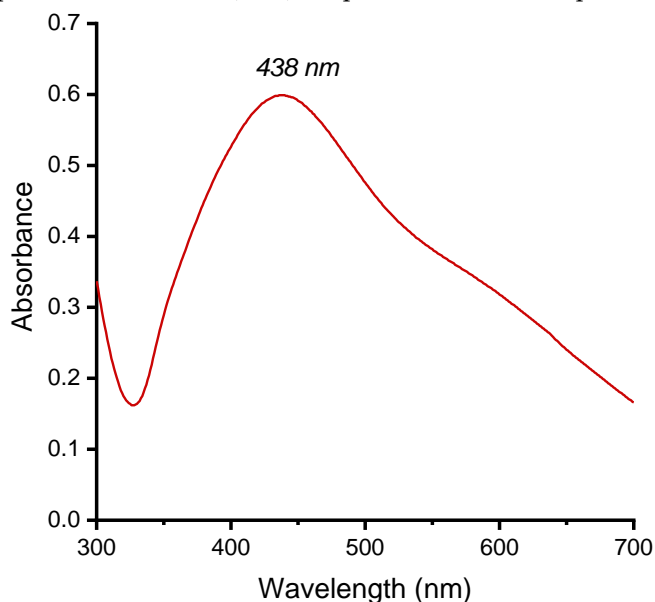

**Figure S1.** UV-vis spectrum of the bio-synthesized AgPBL.

The average size of AgPBL was calculated from the absorption spectrum using equation S1 [51]:

$$D = \frac{h \cdot v_f}{\pi \cdot \Delta E_{\text{half}}} \quad (\text{S1})$$

where

**D** is the diameter of the particle;

**h** is the Planck's constant;

**v<sub>f</sub>** is the Fermi velocity of electrons in bulk silver;

$\Delta E_{\text{half}}$  is the full width at half maximum (FWHM) of the absorption band.

Based on the obtained UV-vis spectrum of AgPBL, the  $\Delta E_{\text{half}}$  value was estimated to be 182 nm. Thus, the average sizes of AgPBL were calculated to be approximately 18 nm. Furthermore, the shape of SPR band observed in the UV-Vis spectrum confirmed the presence of spherical-shaped nanoparticles with a relatively uniform size of AgPBL [52].

The TEM images of AgPBL shown in Figure S2a,b visually confirmed the presence of spherical-shaped nanoparticles. The diameter of the nanoparticles was measured using Java Image Processing Software Image J (Image J 1.53, National Institutes of Health, Bethesda, MD, USA), and the size distribution histogram was plotted in Figure S2c. The analysis revealed that AgPBL exhibited a narrow size distribution and the average particle size was determined to be  $18.4 \pm 4.6$  nm using Image J software [53,54].

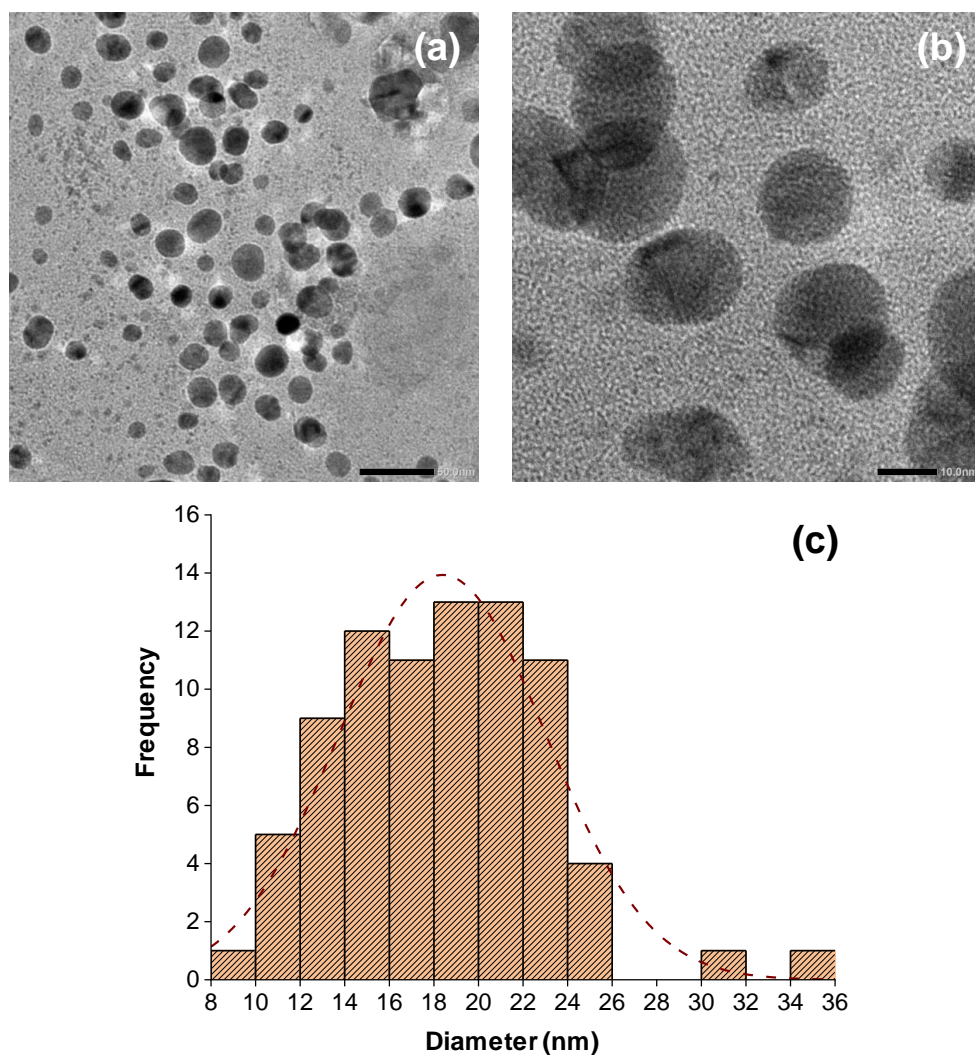

**Figure S2.** TEM images of the AgPBL with magnification of (a)  $\times 100k$  and (b)  $\times 400k$ ; (c) The particle size distribution of the AgPBL as measured by Image J software.
